# Development of GPCR Modulation of GABAergic Transmission in Chicken Nucleus Laminaris Neurons

Zheng-Quan Tang, Yong Lu\*

Department of Anatomy and Neurobiology, Northeast Ohio Medical University, College of Medicine, Rootstown, Ohio, United States of America

## Abstract

Neurons in the nucleus laminaris (NL) of birds act as coincidence detectors and encode interaural time difference to localize the sound source in the azimuth plane. GABAergic transmission in a number of CNS nuclei including the NL is subject to a dual modulation by presynaptic GABA<sub>B</sub> receptors (GABA<sub>B</sub>Rs) and metabotropic glutamate receptors (mGluRs). Here, using in vitro whole-cell patch clamp recordings from acute brain slices of the chick, we characterized the following important but unknown properties pertaining to such a dual modulation: (1) emergence of functional GABA synapses in NL neurons; (2) the temporal onset of neuromodulation mediated by GABA<sub>B</sub>Rs and mGluRs; and (3) the physiological conditions under which GABA<sub>B</sub>Rs and mGluRs are activated by endogenous transmitters. We found that (1) GABA<sub>A</sub>R-mediated synaptic responses were observed in about half of the neurons at embryonic day 11 (E11); (2) GABA<sub>B</sub>R-mediated modulation of the GABAergic transmission was detectable at E11, whereas the modulation by mGluRs did not emerge until E15; and (3) endogenous activity of GABA<sub>B</sub>Rs was induced by both low- (5 or 10 Hz) and high-frequency (200 Hz) stimulation of the GABAergic pathway, whereas endogenous activity of mGluRs was induced by high- (200 Hz) but not low-frequency (5 or 10 Hz) stimulation of the glutamatergic pathway. Furthermore, the endogenous activity of mGluRs was mediated by group II but not group III members. Therefore, autoreceptor-mediated modulation of GABAergic transmission emerges at the same time when the GABA synapses become functional. Heteroreceptor-mediated modulation appears at a later time and is receptor type dependent in vitro.

**Citation:** Tang Z-Q, Lu Y (2012) Development of GPCR Modulation of GABAergic Transmission in Chicken Nucleus Laminaris Neurons. PLoS ONE 7(4): e35831. doi:10.1371/journal.pone.0035831

**Editor:** Jun Yan, Hotchkiss Brain Institute, University of Calgary, Canada

**Received:** January 19, 2012; **Accepted:** March 22, 2012; **Published:** April 24, 2012

**Copyright:** © 2012 Tang, Lu. This is an open-access article distributed under the terms of the Creative Commons Attribution License, which permits unrestricted use, distribution, and reproduction in any medium, provided the original author and source are credited.

**Funding:** This work was supported by the National Institute on Deafness and other Communication Disorders (NIDCD) Grant R01 DC008984 (YL). The funders had no role in study design, data collection and analysis, decision to publish, or preparation of the manuscript.

**Competing Interests:** The authors have declared that no competing interests exist.

\* E-mail: ylu@neomed.edu

## Introduction

Synaptic transmission is dynamically modulated by G-protein-coupled receptors (GPCRs) acting as autoreceptors or heteroreceptors [1,2]. Commonly found among these receptors are metabotropic glutamate receptors (mGluRs) [3,4,5] and type-B GABA receptors (GABA<sub>B</sub>Rs) [6,7], which are activated by the two most prevalent excitatory and inhibitory neurotransmitters in the vertebrate CNS, glutamate and GABA, respectively. These receptors play important modulatory roles in a variety of auditory nuclei by mediating long-term plasticity, regulating transmitter release, and altering neuronal response properties [8,9,10]. A dual modulation of GABA release by both presynaptic GABA<sub>B</sub>Rs and mGluRs has been found in a number of CNS nuclei including two avian auditory nuclei involved in coding of temporal information of sounds [11,12,13]. In such cases, GABA<sub>B</sub>Rs function as autoreceptors modulating GABA release via a use-dependent feedback mechanism, whereas mGluRs function as heteroreceptors modulating GABA release. Because these previous studies have been mainly focused on characterizing the neuromodulation in relatively mature tissues, a number of important questions pertaining to the development of such a dual modulation remain unanswered. Does the autoreceptor-mediated modulation emerge at the same time when the GABA synapses start functioning through postsynaptic ionotropic receptors? Which one appears first, the modulation mediated by autoreceptors or the modulation

mediated by heteroreceptors? Are the physiological conditions, under which the heteroreceptors are activated by endogenous glutamate and exert their modulatory effects, similar to those for autoreceptors?

The avian nucleus laminaris (NL) circuit constitutes an excellent model system to address these questions. Both the anatomy and the physiological function of the NL have been well characterized [14,15]. NL neurons receive both glutamatergic and GABAergic inputs, providing the sources for the two native neurotransmitters that activate mGluRs and GABA<sub>B</sub>Rs involved in the dual modulation of GABA release. The development of the glutamatergic input to the NL, which originates from bushy cells in the cochlear nucleus magnocellularis (NM), has been well established. Synaptic connections between NM and NL form at E8/9 when these two nuclei originating from the auditory anlage start to be structurally separated [16,17]. Physiological recordings in brain slices have demonstrated that these synapses become functional (defined as the appearance of synaptic responses mediated by postsynaptic ionotropic receptors evoked by activating their afferent fibers) at E10/11, a few days after synapse formation [18,19]. In contrast, the development of the GABAergic input to the NL, which originates primarily from the superior olivary nucleus (SON), is not fully understood. While anatomical data have shown that GABA terminals to the NL have little presence at E9–11 and a few GABAergic fibers are present at E12–14 [20],

physiological data about the onset of functional GABA synapses are lacking. Therefore one of the goals of this study was to determine when the GABA synapses in NL became functional.

Regarding the temporal onset of GABA<sub>B</sub>R- and mGluR-mediated modulation of GABA release, two intriguing and intuitive hypotheses can be formed. First, modulation mediated by the autoreceptors starts functioning prior to that by heteroreceptors. Even before synaptogenesis, both GABA<sub>B</sub>Rs and GABA<sub>A</sub>Rs are expressed on neuronal membranes and the GABA signaling via these receptors participates in many cellular events in early development such as cell growth, survival, migration, and synaptogenesis [21]. The presence of both GABA<sub>B</sub>Rs and GABA<sub>A</sub>Rs in early development renders the possibility of autoreceptor-mediated modulation to appear immediately after the synapses become functional. Therefore, we predicted that GABA<sub>B</sub>R-mediated modulation took place prior to mGluR-mediated modulation of GABAergic transmission in the NL. The second hypothesis predicted that the physiological conditions that induced the endogenous activity of GABA<sub>B</sub>Rs in neuromodulation differed from those for mGluRs. Multiple factors, such as the spiking activity level of the presynaptic terminals, the spatial-temporal features of the transmitter diffusion, clearance mechanisms of transmitters, receptor affinity, and subcellular location of the receptors, may be involved in determining the extent of activation of these receptors [22,23]. Being present on the presynaptic terminal membranes surrounding the synaptic cleft or sometimes located directly in the cleft area, autoreceptors are physically close to the transmitter release sites, enhancing the chance for activation of the autoreceptors by spilled over transmitter molecules. In contrast, heteroreceptors are generally located farther in distance from the release sites of their endogenous transmitter, and the chance of direct synapsing onto the synaptic terminals where these heteroreceptors are located is rare [22,23]. Therefore, modulation mediated by endogenous activity of heteroreceptors may require more intense synaptic activity of the corresponding inputs than that mediated by autoreceptors.

## Methods

### Slice preparation and in vitro whole-cell recordings

Fertilized chicken eggs were purchased from Meyers Hatchery. Eggs were incubated using an RX2 Auto Turner and a Clearview Brooder (Lyon Electric Co., Chula Vista, CA). Brainstem slices (250–300 µm in thickness) were prepared from chicken embryos, as described previously [24], with modification of the components of the artificial cerebrospinal fluid (ACSF) used for dissecting and cutting the brain tissue. The modified ACSF, which is a glycerol-based solution [25], contained (in mM): 250 glycerol, 3 KCl, 1.2 KH<sub>2</sub>PO<sub>4</sub>, 20 NaHCO<sub>3</sub>, 3 HEPES, 1.2 CaCl<sub>2</sub>, 5 MgCl<sub>2</sub>, and 10 dextrose, pH 7.4 when gassed with 95% O<sub>2</sub> and 5% CO<sub>2</sub>. The procedures were approved by the Institutional Animal Care and Use Committee (IACUC) at Northeast Ohio Medical University, and are in accordance with NIH policies on animal use. Slices were incubated at 34–36°C for 1 hr in normal ACSF containing (in mM): 130 NaCl, 26 NaHCO<sub>3</sub>, 3 KCl, 3 CaCl<sub>2</sub>, 1 MgCl<sub>2</sub>, 1.25 NaH<sub>2</sub>PO<sub>4</sub> and 10 dextrose. ACSF was constantly gassed with 95% O<sub>2</sub> and 5% CO<sub>2</sub> (pH 7.4). For recording, slices were transferred to a 0.5 ml chamber mounted on a Zeiss Axioskop 2 FS Plus microscope (Zeiss, Germany) with a 40×- water-immersion objective and infrared, differential interference contrast optics. The chamber was continuously superfused with ACSF (2–2.5 ml/min) by gravity. The microscope was positioned on the top center of an Isolator CleanTop II and housed inside a Type II Faraday

cage (Technical Manufacturing Corporation, Peabody, MA). Recordings were performed at 34–36°C, controlled by a Single Channel Temperature Controller TC324B (Warner Instruments, Hamden, CT).

Patch pipettes were drawn on an Electrode Puller PP-830 (Narishige, Japan) to 1–2 µm tip diameter using borosilicate glass Micropipets (inner diameter of 0.86 mm, outer diameter of 1.60 mm) (VWR Scientific, Seattle, WA). The electrodes had resistances between 3 and 7 MΩ when filled with a solution containing (in mM): 105 K-gluconate, 35 KCl, 5 EGTA, 10 HEPES, 1 MgCl<sub>2</sub>, 4 ATP-Mg, and 0.3 GTP-Na, with pH of 7.2 (adjusted with KOH) and osmolarity between 280 and 290 mOsm. The Cl<sup>−</sup> concentration (37 mM) in the internal solution approximated the physiological Cl<sup>−</sup> concentration in NL neurons, measured previously [13]. Placement of the recording electrodes was controlled by a motorized micromanipulator MP-225 (Sutter Instrument, Novato, CA). The liquid junction potential was 10 mV, calculated using a software package by Barry [26], and data were corrected accordingly.

The voltage clamp experiments were performed with an AxoPatch 200B amplifier (Molecular Devices, Union City, CA). Data were low-pass filtered at 3–10 kHz, and digitized using a Data Acquisition Interface ITC-18 (Instrutech, Great Neck, NY) at 20 kHz. Recording protocols were written and run using the acquisition and analysis software AxoGraph X (AxoGraph Scientific, Australia).

All chemicals and drugs were obtained from Sigma (St Louis, MO) except for (±)-1-Aminocyclopentane-*trans*-1,3-dicarboxylic acid (tACPD), 3-[[[3,4-Dichlorophenyl)methyl]amino]propyl] diethoxymethylphosphinic acid (CGP52432), (RS)- $\alpha$ -Cyclopropyl-4-phosphonophenylglycine (CPPG), (2S)-2-Amino-2-[(1S,2S)-2-carboxycycloprop-1-yl]-3-(xanth-9-yl) propanoic acid (LY341495), 1,2,5,6-Tetrahydro-1-[2-[[[diphenylmethylene)amino]oxy]ethyl]-3-pyridinecarboxylic acid hydrochloride (NNC 711), DL-*threo*- $\beta$ -Benzyloxyaspartic acid (DL-TBOA), and (3S)-3-[[3-[[4-(Trifluoromethyl)benzoyl]amino]phenyl]methoxy]-L-aspartic acid (TFB-TBOA), which were obtained from Tocris (Ballwin, MO). All drugs were bath-applied except for 5-Aminomethyl-3-hydroxyisoxazole (muscimol), which was applied with pressure ejection (puff application) by using a multi-channel picospritzer (General Valve, Fairfield, NJ). Muscimol (10 µM) was prepared in ACSF containing 6,7-Dinitroquinoxaline-2,3-dione (DNQX, 50 µM) and D-(-)-2-Amino-5-phosphonopentanoic acid (APV, 100 µM), antagonists for ionotropic glutamate receptors (AMPA and NMDA receptors, respectively). Puff electrodes were prepared using the same pulling methods as producing recording electrodes except that the puff electrodes had larger tip diameter (2–5 µm). The puff electrode was placed above and lateral to the recorded cell at a distance of 50–100 µm. Positive pressure (30–70 kPa, duration of 200 ms) was used to eject the muscimol-containing solution.

### Synaptic stimulation and recordings of synaptic responses

Extracellular synaptic stimulation was performed using concentric bipolar electrodes with a tip core diameter of 127 µm (World Precision Instruments, Sarasota, FL). Because of the small size of NL and limited number of slices that can be obtained from young embryos (e.g., 1–2 slices at E11–13 that contain distinguishable NL) [18], we did not classify cells based on frequency regions. In relatively older embryos (>E15), we intentionally recorded cells from approximately the mid/high-frequency regions in order to avoid complications in our interpretation introduced by tonotopic distribution of neuronal properties. Neurons in the NL receive

GABAergic inhibitory inputs primarily from the ipsilateral SON [27,28,29]. To activate the GABAergic pathway, the stimulation electrode was placed using a Micromanipulator NMN-25 (Narishige, Japan) in the area immediately lateral to the NL where the ipsilateral SON fibers travel to innervate the NL. To activate both the GABAergic and the glutamatergic pathways, the stimulation electrode was placed in an area dorsal and lateral to the NL, where fibers from the ipsilateral NM and SON fibers are mixed. Single or train stimulations at different frequencies (pulse duration of 200  $\mu$ s) were delivered through a Stimulator A320RC (World Precision Instruments, Sarasota, FL). Optimal stimulus parameters were selected for each cell to give rise to reliable postsynaptic currents. Before each synaptic stimulation protocol was applied, a 5 mV hyperpolarizing command (duration of 5 ms) was given to monitor series resistance and input resistance during the experiment. Cells with >20% changes in their series resistance during the recordings were discarded.

Evoked inhibitory postsynaptic currents (IPSCs) were recorded in the presence of DNQX (50  $\mu$ M) and APV (100  $\mu$ M). The synaptic stimulation was repeated 6–12 times under each experimental condition. The raw traces were averaged off-line and the peak values of IPSCs were measured. The average of the peak values of the IPSCs was considered as one data point, representing the averaged IPSC under the experimental condition. These methods have been established in our previous studies [11,12].

Graphs were constructed in Igor (Wavemetrics, Lake Oswego, OR). Means and standard errors of the mean (SEM) are reported (n in parenthesis indicates number of cells). ANOVA post hoc Fisher's test was used for statistical analyses, and  $p < 0.05$  was considered statistically significant.

## Results

### Onset of GABA<sub>A</sub>R responses in NL neurons

Because neuromodulation mediated by GABA<sub>B</sub>Rs activated by endogenous GABA relies on the presence of functional GABA synapses, we first characterized the onset of GABAergic transmission in the NL. Based on the anatomical data showing that GABA terminals to the NL have little presence at E9–11 and a few GABAergic fibers are present at E12–14 [20], we chose E11 as the earliest age to study the onset of physiological responses mediated by GABA<sub>A</sub>Rs in NL neuron. After obtaining whole-cell voltage clamp recordings from NL neurons, we used a series of stimulating approaches combined with pharmacological agents to evoke whole-cell responses sensitive to GABA<sub>A</sub>R blockers (Fig. 1). Ionotropic glutamate receptor blockers (50  $\mu$ M DNQX and 100  $\mu$ M APV) were present in all experiments. Puff application of a selective GABA<sub>A</sub>R agonist muscimol (10  $\mu$ M), which was used to bypass the presynaptic GABA terminals and activate postsynaptic receptors directly, evoked inward currents (termed I-muscimol) in all cells studied. The inward currents were nearly completely blocked by 6-Imino-3-(4-methoxyphenyl)-1(6H)-pyridazinebutanoic acid (SR95531, 10  $\mu$ M), an antagonist specific for GABA<sub>A</sub>Rs (Fig. 1A, D), indicating the presence of functional postsynaptic GABA<sub>A</sub>Rs on NL cell membrane at E11. Some spontaneous IPSCs (sIPSCs) were readily observed in the sample cell (Fig. 1A). This observation was further confirmed by prolonged recordings, in which 5 out of 15 cells showed sparsely distributed sIPSCs within a five-minute recording window. The sIPSCs were eliminated by SR95531, indicating that GABA<sub>A</sub>Rs mediated the currents (Fig. 1B, D) and GABA synapses started functioning in at least some NL cells at E11. Electrical shocks delivered to the presumably GABAergic afferents to the NL also

evoked inward currents sensitive to SR95531 (Fig. 1C), further confirming the presence of functional GABAergic synapses. Cells were more reliably responsive to train stimulation (10 Hz 5 pulses) (6 out of 8 cells) than single-pulse stimulation (3 out of 6 cells) (Fig. 1D), possibly caused by facilitation of transmitter release under the train stimulation.

### Modulation of GABAergic transmission mediated by GABA<sub>B</sub>Rs emerges prior to that by mGluRs

Modulation of GABA release in NL neurons by autoreceptors (GABA<sub>B</sub>Rs) starts prior to that by heteroreceptors (mGluRs). This conclusion is based on the experiments in which we studied the effects of respective agonists for GABA<sub>B</sub>Rs and mGluRs on IPSCs of NL neurons obtained from animals of different ages. We elicited IPSCs with a low frequency (5 or 10 Hz, 5 pulses) train stimulation, and then a potent GABA<sub>B</sub>R agonist baclofen at its saturating concentration (100  $\mu$ M) was applied. Significant suppression of the IPSCs was observed at the earliest age we studied (E11), and the suppression became stronger at E13, and remained strong in later ages (Fig. 2A, B; Table 1;  $n = 6, 7, 7$ , and 5 cells for E11, E13, E15, and E18, respectively).

To date, there are 8 members of mGluRs identified, and they are further divided into 3 groups (group I: mGluR1 and 5; II: mGluR2 and 3; and III: mGluR4, 6, 7, and 8) based on their homology, pharmacology, and signal transduction pathways [3,4,5]. To determine the temporal onset of mGluR-mediated modulation of GABA release in NL, we studied the effects of tACPD (100  $\mu$ M), an agonist that can activate non-selectively most members of mGluRs [3], on IPSCs of NL neurons obtained at different ages. In contrast to the early onset of baclofen effects, significant suppression of IPSCs by tACPD (100  $\mu$ M) was detected in E15 and E18 but not in earlier embryos (E12 or E13) (Fig. 2C, D; Table 1;  $n = 6, 5, 8$ , and 7 cells for E12, E13, E15, and E18, respectively). Because modulatory effects of tACPD were not observed at E12/13, studies using animals of earlier ages were unnecessary. It is noted that the time course of the IPSCs was different among the sampled cells. This is possibly due to the combined effects of two factors, one being developmental changes and the other being tonotopic specializations of neuronal properties. Supporting the effects of the second factor, we recently found that the time course of the postsynaptic GABA<sub>A</sub> currents in NL neurons differed between different characteristic frequency (CF) regions. Compared to low-CF (LF) neurons, middle/high-CF (MF/HF) neurons had significantly slower IPSCs. To account for these distinct GABA<sub>A</sub> responses, we showed that MF/HF neurons exhibited more prominent asynchronous release of GABA (our unpublished observations).

### Endogenous activity of GABA<sub>B</sub>Rs is stimulus frequency dependent

Because higher input frequencies are expected to trigger strong and long-lasting release of GABA and likely subsequent activation of presynaptic GABA<sub>B</sub>Rs via transmitter spillover, we predicted that the level of endogenous GABA<sub>B</sub>R activity was stimulus frequency dependent. To test this hypothesis, we elicited IPSCs in NL neurons (E16–17) using train stimulations at low (5 or 10 Hz) and high (200 Hz) frequencies, and examined the effects on the IPSCs of a GABA<sub>B</sub>R antagonist CGP52432. At the concentration used (10  $\mu$ M), CGP52432 is supposed to achieve saturating block of GABA<sub>B</sub>Rs [30]. In response to low frequency stimulation (5 or 10 Hz, 5 pulses), IPSC amplitude was unchanged when CGP52432 (10  $\mu$ M) was applied (Fig. 3A, B; control:  $-479.4 \pm 89.7$  pA; CGP52432:  $-468.0 \pm 79.5$  pA, washout:

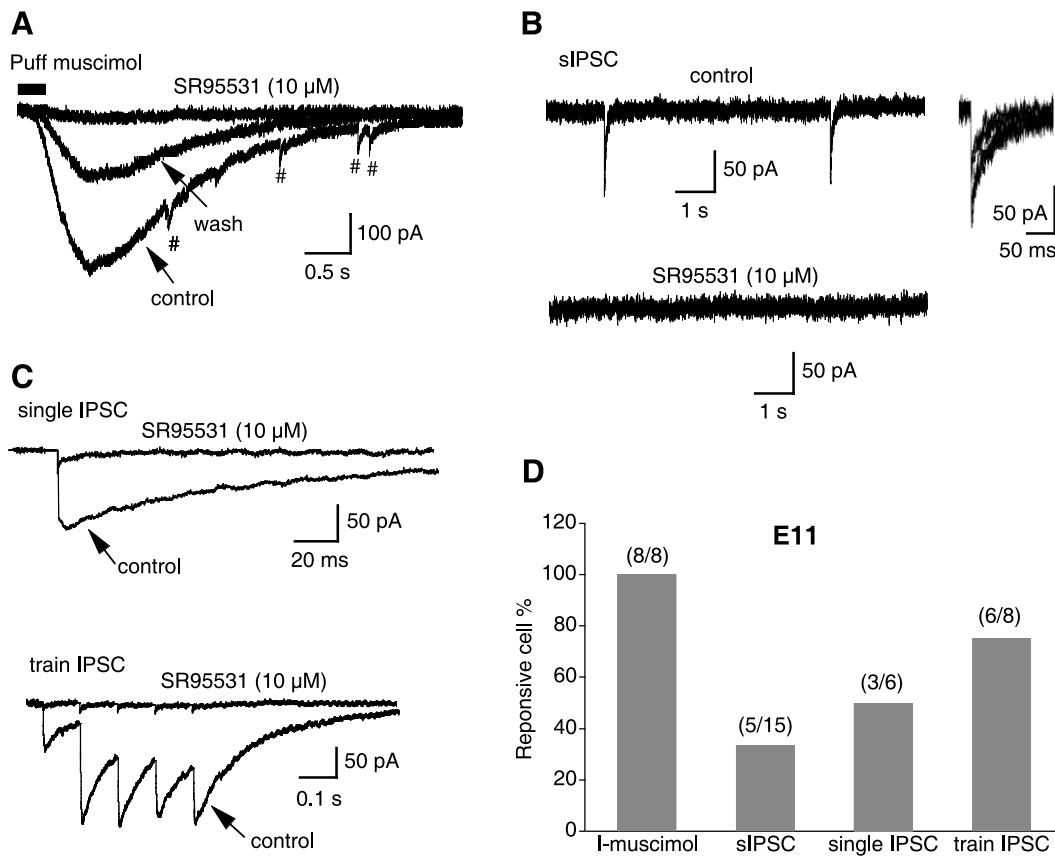

**Figure 1. GABAergic transmission starts functioning in about half of the NL neurons at E11.** **A**, Puff application of a selective GABA<sub>A</sub>R agonist muscimol (10 μM) evoked an inward current that was nearly completely blocked by SR95531 (10 μM), an antagonist specific for GABA<sub>A</sub>Rs, indicating the presence of functional GABA<sub>A</sub>Rs on NL cell membrane. Spontaneous IPSCs (sIPSCs) are indicated by the symbol #. **B**, Voltage clamp recordings from a sample cell showing sparsely distributed sIPSCs that were eliminated by SR95531, indicating that GABA<sub>A</sub>Rs mediated the sIPSCs. Shown on the right are superimposed sIPSCs at an enlarged time scale. **C**, Electrical shocks (upper panel: single pulse stimulation; lower panel: train stimulation at 10 Hz) delivered to the GABAergic afferents to the NL evoked inward currents sensitive to SR95531, indicating the presence of functional GABA synapses. Stimulus artifacts are blanked for clarity. **D**, Percent of responsive cells under different recording conditions. All cells showed responses to muscimol, 5 out of 15 cells expressed sIPSCs, 3 out of 6 cells responded to the single pulse stimulation, and 6 out of 8 cells responded to the train stimulation. Cells were voltage clamped at −60 mV. DNQX (50 μM) and APV (100 μM), AMPAR and NMDAR blockers, respectively, were present in all experiments. doi:10.1371/journal.pone.0035831.g001

−498.2±102.6 pA, n=7, p>0.05), indicating lack of GABA<sub>B</sub>R activity induced by endogenous GABA under this stimulus condition. To enhance the chance of observing endogenous GABA<sub>B</sub>R activity on IPSCs elicited at low stimulating frequencies, we blocked the uptake of GABA, expecting that the transmitter molecules may have longer life span in the synaptic cleft and surrounding areas, facilitating the activation of presynaptic GABA<sub>B</sub>Rs. Inhibition of GABA uptake by NNC 711 (20 μM) reduced IPSCs elicited at 5 or 10 Hz (control: −746.3±119.9 pA; NNC 711: −364.0±56.7 pA, n=7, p<0.001), suggesting the possibility of endogenous activity of GABA<sub>B</sub>Rs in depressing GABA release. Such effects induced by blocking uptake mechanisms have been observed at glutamate synapses [31]. In the presence of NNC 711, blockade of GABA<sub>B</sub>Rs by CGP52432 (10 μM) increased IPSC amplitude significantly (Fig. 3C, D; NNC 711: −364.0±56.7 pA; NNC 711 plus CGP52432: −599.4±116.6 pA, n=7, p<0.05), revealing endogenous GABA<sub>B</sub>R activity. When tested at a high stimulating frequency of 200 Hz, which approximates the sound-evoked discharge rates of SON neurons *in vivo* [32], NL neurons generated temporally summated IPSCs with a long decay time course. CGP52432

(10 μM) alone (without blocking GABA uptake) significantly increased the normalized IPSC amplitude by 49.7±16.8% (Fig. 3E, F; control: −1171.6±374.9 pA; CGP52432: −1529.8±445.0 pA, washout: −855.6±179.2 pA, n=8, p<0.05), indicating activation of the autoreceptors by synaptically released GABA under physiologically relevant stimulations. Along with our previous data showing that CGP52432 significantly increased the IPSCs evoked at 100 Hz [13], these results indicate that activation of presynaptic GABA<sub>B</sub>Rs is stimulus frequency dependent, and presynaptic GABA<sub>B</sub>Rs are activated in response to increased GABA release at high stimulation frequencies, forming a feedback mechanism controlling the GABAergic strength in NL neurons.

### Endogenous activity of mGluRs is stimulus frequency dependent and receptor specific

Although exogenous agonists of mGluRs induced inhibition of GABA release, the physiological significance of such effects can be questioned if endogenous activity of mGluRs cannot be detected [33]. However, when present, endogenous activity of heteroreceptors (mGluRs in this case) may be induced under different

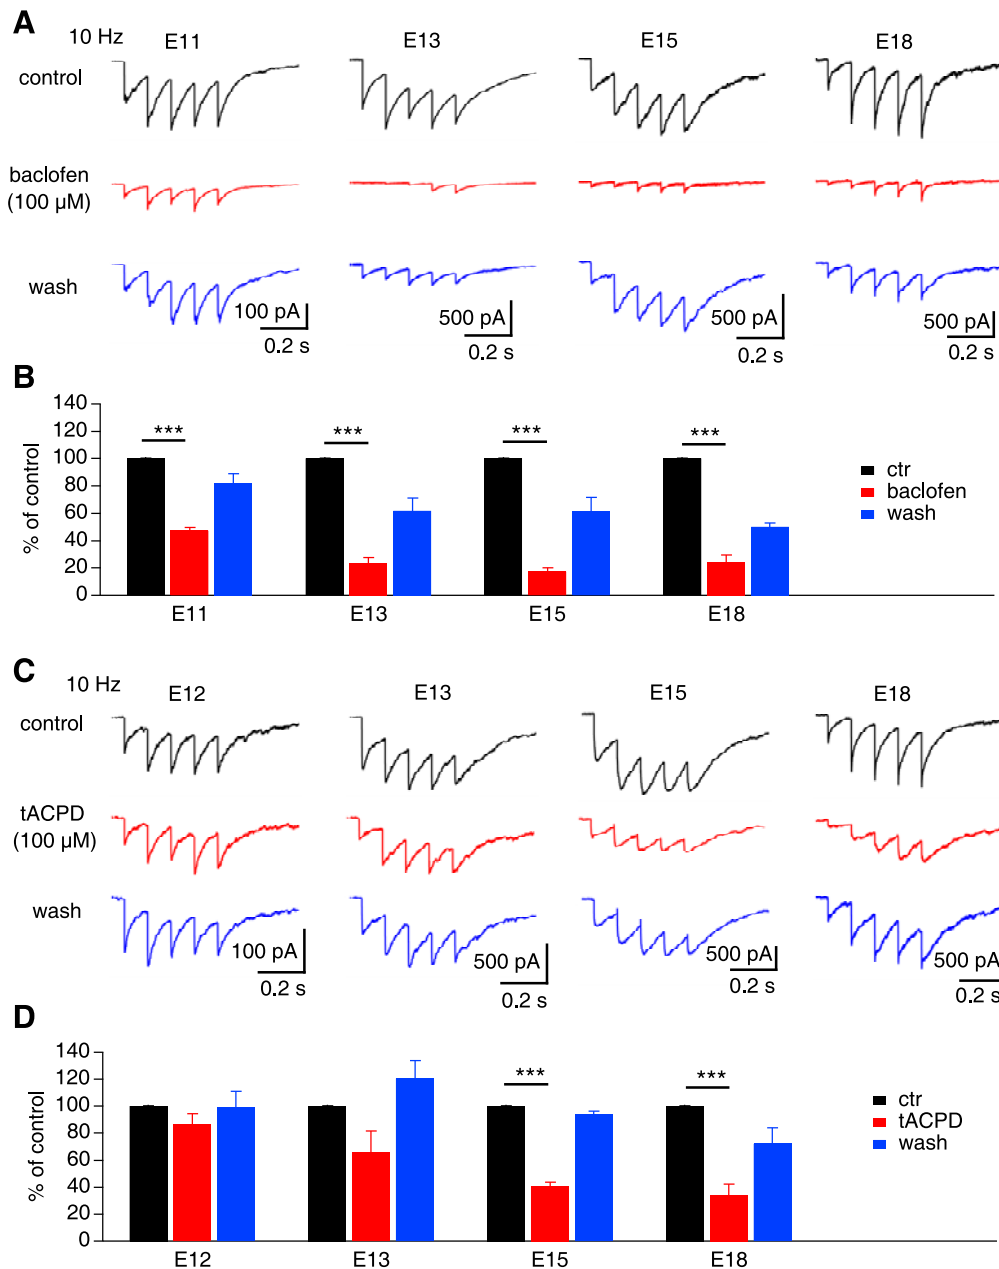

**Figure 2. Modulation of GABAergic transmission in NL neurons by autoreceptors emerges prior to that by heteroreceptors.** **A**, Effects of GABA<sub>B</sub>R agonist baclofen (100  $\mu$ M) on IPSCs of NL neurons obtained from chicken embryos ages of E11, E13, E15, and E18. Inhibition of the IPSCs by baclofen was observed in all cells. **B**, Summary data showing that baclofen (100  $\mu$ M) reduced IPSCs significantly in all ages tested ( $n=6, 7, 7$ , and  $5$  for E11, E13, E15, and E18, respectively). **C**, Effects of mGluR agonist tACPD (100  $\mu$ M) on IPSCs of NL neurons obtained from chicken embryos ages of E12, E13, E15, and E18. **D**, Significant suppression of IPSCs by tACPD (100  $\mu$ M) was detected in E15 and E18 but not at E12 or E13 ( $n=6, 5, 8$ , and  $7$  for E12, E13, E15, and E18, respectively). In this and subsequent figures, bars represent means  $\pm$  SEM. NS: not significant ( $p>0.05$ ), \* $p<0.05$ , \*\* $p<0.01$ , and \*\*\* $p<0.001$  (ANOVA post hoc Fisher's test). doi:10.1371/journal.pone.0035831.g002

stimulation conditions from those of autoreceptors. In order to study the activity of mGluRs activated by synaptically released glutamate, we placed the stimulation electrode in an area dorsal and lateral to the NL to activate both the GABAergic and glutamatergic pathways. Concurrent activation of GABAergic and glutamatergic pathways to NL neurons (E15–19) was observed in response to the same single stimulus (Fig. 4A). Then we examined the effects of mGluR antagonists under different stimulation conditions.

Antagonists at concentrations that are able to block all mGluRs (4  $\mu$ M LY341495 plus 10  $\mu$ M CPPG) [4,5] did not have significant effects on the IPSCs elicited at 5 or 10 Hz (Fig. 4B, C, control:  $-383.6 \pm 74.6$  pA; LY341495 plus CPPG:  $-409.6 \pm 85.9$  pA, washout:  $-361.0 \pm 76.9$  pA,  $n=5$ ,  $p>0.05$ ), indicating lack of endogenous mGluR activity under low frequency stimulus conditions. Increasing the stimulating frequency to 200 Hz, which approximates the discharge rates of NM neurons *in vivo* [34,35], still failed to induce any significant endogenous mGluR activity

**Table 1.** Summary of numerical data on the effects of baclofen (100  $\mu$ M) and tACPD (100  $\mu$ M) on the amplitude (pA) of IPSCs of NL neurons obtained at different ages.

| age (n)      | control            | drug                    | washout            |
|--------------|--------------------|-------------------------|--------------------|
|              | baclofen           |                         |                    |
| E11 (6)      | $-191.3 \pm 28.9$  | $-91.0 \pm 14.9^{**}$   | $-148.0 \pm 18.2$  |
| E13 (7)      | $-269.4 \pm 72.2$  | $-51.0 \pm 10.2^{***}$  | $-150.1 \pm 34.5$  |
| E15 (7)      | $-547.0 \pm 84.8$  | $-89.0 \pm 15.8^{***}$  | $-419.3 \pm 77.9$  |
| E18 (5)      | $-526.4 \pm 162.8$ | $-107.8 \pm 32.6^{***}$ | $-329.0 \pm 80.5$  |
| <b>tACPD</b> |                    |                         |                    |
| E12 (6)      | $-171.9 \pm 38.5$  | $-137.8 \pm 27.2$       | $-160.7 \pm 38.5$  |
| E13 (5)      | $-260.4 \pm 64.4$  | $-156.0 \pm 53.0$       | $-321.5 \pm 103.6$ |
| E15 (8)      | $-517.3 \pm 73.4$  | $-195.1 \pm 26.1^{***}$ | $-291.8 \pm 60.4$  |
| E18 (7)      | $-730.7 \pm 208.4$ | $-168.0 \pm 32.2^{***}$ | $-473.0 \pm 51.7$  |

Means  $\pm$  1 SEM are shown. n: number of cells.

\* $p < 0.05$ ,

\*\* $p < 0.01$ , and

\*\*\* $p < 0.001$  (ANOVA post hoc Fisher's test).

doi:10.1371/journal.pone.0035831.t001

(Fig. 4D, E, control:  $-1118.4 \pm 359.7$  pA; LY341495 plus CPPG:  $-1117.8 \pm 367.8$  pA, washout:  $-910.8 \pm 279.6$  pA,  $n = 5$ ,  $p > 0.05$ ). These results suggest highly efficient clearance mechanisms for released glutamate at the synapses in NL, even though high-rate synaptic activity may delay the clearance process [36]. In order to enhance the chance of detecting endogenous mGluR activity, we blocked glutamate uptake systems, expecting to increase glutamate accumulation in the synaptic cleft and induce activation of mGluRs on GABAergic terminals by glutamate spillover [31,37,38]. Endogenous activity of mGluRs was indeed observed under the condition of high frequency stimulation (200 Hz) combined with full inhibition of glutamate uptake by perfusion of DL-TBOA (50  $\mu$ M) and TFB-TBOA (10  $\mu$ M) (Fig. 4F, G), both of which are glutamate transporter blockers, with the later being more glial specific. Furthermore, such endogenous activity was mGluR type specific. Inhibition of glutamate uptake by TBOA (DL-TBOA 50  $\mu$ M plus TFB-TBOA 10  $\mu$ M) significantly reduced IPSC elicited at 200 Hz (Fig. 4G, control:  $-1063.0 \pm 327.2$  pA; TBOA:  $-567.2 \pm 193.3$  pA,  $n = 5$ ,  $p < 0.01$ ; Fig. 4I, control:  $-705.4 \pm 100.6$  pA; TBOA:  $-360.8 \pm 94.0$  pA,  $n = 5$ ,  $p < 0.01$ ). In the presence of TBOA, specific blockade of group II mGluRs by low concentration of LY341495 (10 nM) [5] increased IPSC significantly (TBOA:  $-567.2 \pm 193.3$  pA; TBOA plus LY341495:  $-819.8 \pm 243.7$  pA,  $n = 5$ ,  $p < 0.01$ ). In contrast, in the presence of TBOA, specific blockade of group III mGluRs by low concentration of CPPG (5 nM) [5,39] had no effects on IPSCs (Fig. 4 H, I, TBOA:  $-360.8 \pm 94.0$  pA; TBOA plus CPPG:  $-318.2 \pm 96.0$  pA,  $n = 5$ ,  $p > 0.05$ ).

## Discussion

We report that: 1) the GABAergic transmission in NL neurons starts functioning at E11; 2) the modulation of GABAergic transmission by autoreceptors takes place prior to that by heteroreceptors; and 3) endogenous activity of GABA<sub>B</sub>Rs and mGluRs is stimulus frequency dependent, and the endogenous activity of mGluRs is group specific.

The emergence of functional GABA synapses shows a short time delay in relative to that of glutamate synapses in NL neurons. Postsynaptic ionotropic glutamate receptors [19] and postsynaptic

GABA<sub>A</sub>Rs (present study) were detectable in all cells at the earliest ages studied (E9 and E11, respectively). The early appearance of ionotropic glutamate and GABA<sub>A</sub> receptors is not surprising because postsynaptic receptor-mediated signaling exists well before presynaptic terminals arrive to innervate developing neurons [21]. Soon after formation of glutamate synapses, synaptic responses emerge. At E10, evoked EPSCs mediated by both AMPARs and NMDARs are observed in about 75% cells [19], and evoked EPSPs are present in all cells studied at E11 [18,19]. In contrast, synaptic GABA<sub>A</sub>R activity, either in the form of spontaneous or stimulus-evoked IPSCs, was detected in only about half of the neurons at E11, indicating that the development of the GABAergic transmission has a roughly 1-day delay relative to the development of the glutamatergic transmission. We cannot exclude the possibility that functional GABA synapses might appear in some cells at earlier ages, however, based on the present study, the proportion of cells that express functional GABA synapses is expected to be much lower than that at E11. Although the functional GABA synapses emerged with a time delay compared to glutamate synapses, the GABA<sub>B</sub>R-mediated modulation of GABA release took place a few days earlier than mGluR-mediated modulation (E11 vs. E15). The later appearance of heteroreceptor-mediated modulation may correlate with the functional expression of mGluRs, the time of hearing onset, and/or the development of the glutamatergic synapses. Although all three groups of mGluRs are expressed in NL at E13 (our unpublished observation), signaling transduction pathways linking mGluRs to the regulation mechanisms of GABA release may not be present at E13 and earlier ages. The emergence of mGluR activity on regulating GABA release at E15 may reflect the establishment of such signaling pathways, likely driven by the fast maturation of the glutamatergic inputs during the period of development after hearing onset, which occurs at about E11/12 [40]. The increase in synaptic activity mediated by glutamate, especially the patterned spontaneous spiking activity between E13–18 in NM and NL neurons [41], may facilitate expression of membrane mGluRs and establishment of their signaling transduction pathways.

GABA<sub>B</sub>Rs and mGluRs belong to the same subfamily of GPCRs, and share many structural and functional similarities

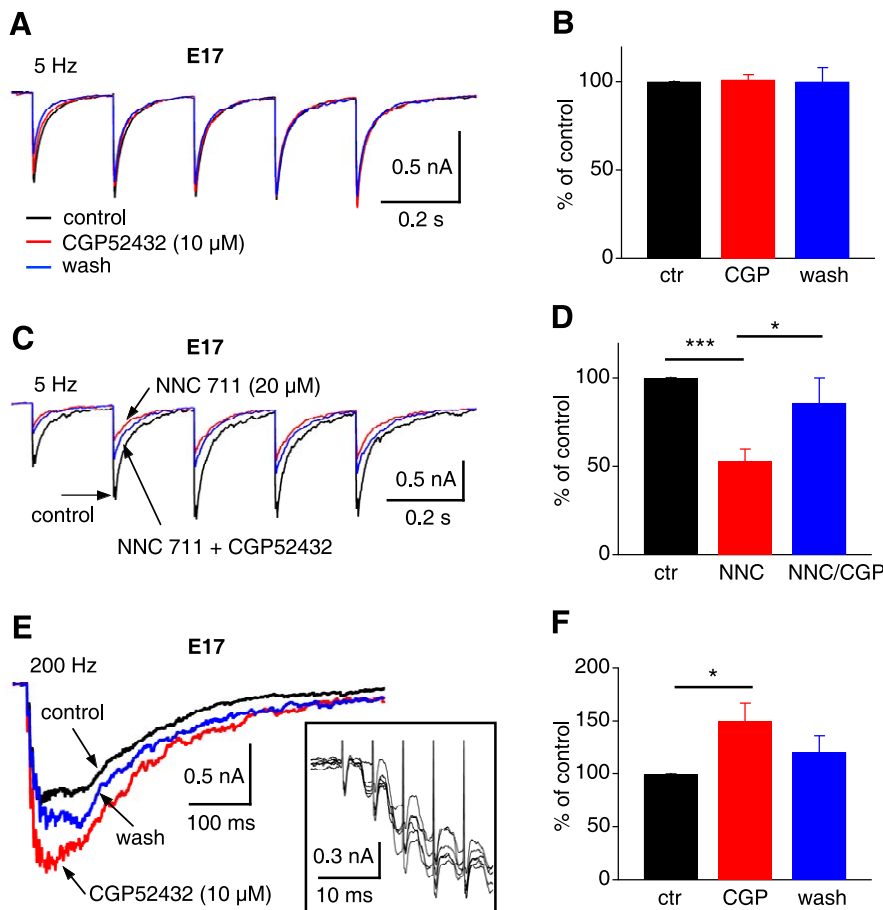

**Figure 3. Endogenous activity of GABA<sub>B</sub>Rs is stimulus frequency dependent.** *A*, Average IPSC traces of one NL neuron (E16–17) in response to train stimulations at 5 Hz (5 pulses) under the conditions of control, GABA<sub>B</sub>R antagonist CGP52432 (10 μM), and washout. *B*, IPSC peak amplitude normalized to the control showed that CGP52432 did not have significant effects on the IPSCs elicited at 5 Hz ( $n = 7$ ), indicating lack of endogenous GABA<sub>B</sub>R activity under this stimulation condition. *C & D*, Blocking GABA uptake by NNC 711 (20 μM) reduced IPSCs elicited at 5 Hz. In the presence of NNC 711, CGP52432 (10 μM) increased IPSC amplitude significantly ( $n = 7$ ), revealing endogenous GABA<sub>B</sub>R activity. *E & F*, In response to blockade of GABA<sub>B</sub>Rs by CGP52432 (10 μM), a significant increase in IPSC amplitude was observed at the stimulus frequency of 200 Hz ( $n = 8$ ). The inset in panel E shows six superimposed individual IPSCs obtained under control conditions, at enlarged scales. Only the responses to the first five stimulus pulses (without blanking the stimulus artifacts) are shown to indicate low noise levels of the recordings.  
doi:10.1371/journal.pone.0035831.g003

including signaling transduction pathways [1–7]. While it awaits to be demonstrated whether these two different types of receptors colocalize on the presynaptic terminals of the GABA synapses in NL neurons, and whether they exert their modulatory actions independently and/or synergistically, we can make some implications based on our results of percent inhibitions of IPSCs induced by the respective agonists of GABA<sub>B</sub>Rs and mGluRs at different ages (Fig. 2). At E11–12, baclofen caused a significant inhibition (53%) of IPSCs while tACPD caused a statistically non-significant inhibition (13%). The total inhibition (66%) could imply two independent pathways for these two different types of receptors, if the total inhibition continued to be less than 100% in older ages. However, at E13, E15 and E18, the total inhibition increased to 111%, 142% and 142%, respectively, exceeding the predicted value (about 100%) if the two pathways were completely independent. These results suggest that GABA<sub>B</sub>Rs and mGluRs at the GABA synapses of NL neurons may share at least some signaling transduction pathways in modulation of GABA release.

Endogenous activity of both GABA<sub>B</sub>R- and mGluR-mediated modulation of GABAergic transmission expressed stimulus frequency dependence. However, the stimulus conditions under

which such endogenous activity was detected differed. Specifically, the requirements to activate autoreceptors seemed to be less robust than those to activate heteroreceptors. Endogenous GABA<sub>B</sub>R activity at low stimulus frequencies was detected when GABA uptake was blocked. In contrast, endogenous mGluR activity was not elicited by low frequency stimulations of the glutamatergic pathway, even in the presence of glutamate uptake blockers. At more physiological relevant stimulus frequencies such as 100 Hz [13] or 200 Hz (present study), endogenous GABA<sub>B</sub>R activity was detectable even without blocking GABA uptake. In contrast, endogenous mGluR activity was not detected at high frequencies of 100 Hz [13] or 200 Hz (present study), unless glutamate uptake was blocked. The relative ease of activation of the autoreceptors has been observed at glutamate synapses as well [42,43].

To be physiologically relevant, the regulation of GABA release by endogenous mGluRs must rely on glutamate spillover from glutamatergic terminals located nearby the GABA synapses. Since glutamate spillover was first discovered in 1997 in the hippocampus [44], it is commonly found in numerous CNS nuclei [45,46,47]. However, because of the strong uptake mechanisms of glutamate into glial cells [22], spillover of glutamate may only

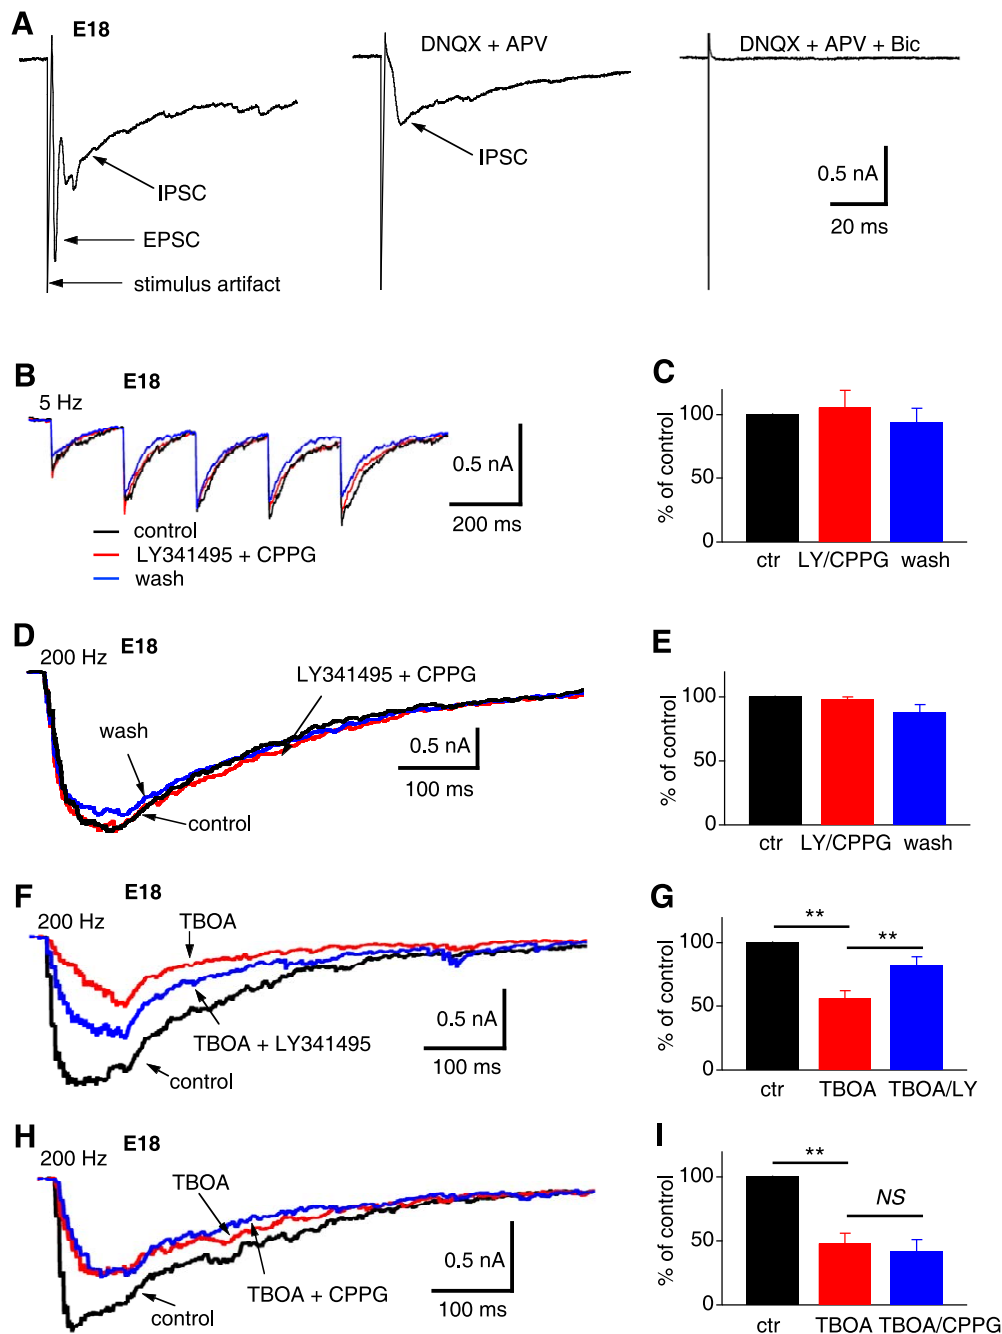

**Figure 4. Endogenous activity of mGluRs is stimulus frequency dependent and receptor specific.** *A*, Concurrent activation of glutamatergic and GABAergic pathways to NL neurons (E15–19). Cells used in this figure responded to the synaptic stimulation with both a fast EPSC and a slow IPSC. DNQX and APV eliminated the EPSC, and a specific GABA<sub>A</sub>R antagonist bicuculline (40  $\mu$ M) eliminated the IPSC. *B & C*, Antagonists able to block all mGluRs (4  $\mu$ M LY341495 plus 10  $\mu$ M CPPG) did not have significant effects on the IPSCs elicited at 5 or 10 Hz ( $n = 5$ ), indicating lack of endogenous mGluR activity under low frequency stimulation conditions. *D & E*, Further increasing the stimulating frequency to 200 Hz still failed to induce endogenous mGluR activity ( $n = 5$ ). *F & G*, Endogenous activity of mGluRs was observed under the condition of high frequency (200 Hz) stimulation combined with inhibition of glutamate uptake. Furthermore, such endogenous activity was mGluR type specific. Inhibition of glutamate uptake by TBOA (DL-TBOA 50  $\mu$ M plus TFB-TBOA 10  $\mu$ M) reduced IPSCs elicited at 200 Hz. In the presence of TBOA, blockade of group II mGluRs by low concentration of LY341495 (10 nM) increased IPSC amplitude significantly ( $n = 5$ ). *H & I*, In contrast, in the presence of TBOA, blockade of group III mGluRs by CPPG (5 nM) had no effects on IPSC ( $n = 5$ ). doi:10.1371/journal.pone.0035831.g004

occur when a burst of spike activity is present, especially in vitro [45]. Presumably, the appearance of endogenous activity of mGluRs as heteroreceptors modulating GABA release in the NL may be facilitated by the morphological development of the

dendrites in NL. In early developmental stages (E8/9), NL dendrites are of about equal length across different characteristic frequency (CF) regions. After a tremendous growth in dendritic arborization combined with apoptosis of NL cells during

development, the dendrites in middle/high-CF regions shrink while those in low-CF regions grow in length, forming a gradient in dendritic length along the tonotopic axis [48,49], a process influenced by astrocyte-secreted factors [50]. In addition, the inhibitory inputs to NL neurons are distributed on the soma as well as along the dendrites, where the glutamatergic synapses are located [51,52]. These morphological changes could bring the two synaptic inputs closer in space, enhancing the chance of activation of mGluRs located on presynaptic terminals of the GABA synapses, and rendering heteroreceptor-mediated modulation of GABAergic transmission possible. In our present study, we intentionally recorded cells from slices obtained in older embryos (>E15) in approximately the mid/high-frequency regions in order to avoid complications in our interpretation introduced by tonotopic distribution of neuronal properties. It remains interesting for future studies to examine whether NL neurons from high CF regions display stronger endogenous mGluR activity than neurons from low CF regions. Such a notion can be supported by the observation that endogenous activity of mGluRs in regulating GABA release in NM neurons is readily detected under low frequency (10 Hz) stimulation without blocking glutamate uptake [12]. The ease of inducing mGluR activity in NM neurons is possibly due to the fact that NM neurons receive morphologically huge [53] and physiologically powerful [54] glutamatergic inputs (Endbulb of Held synapses) onto their cell bodies, where the inhibitory synapses are also located [55].

Finally, both groups II and III mGluRs suppress GABA release in NL via presynaptic mechanisms, and endogenous activity of mGluRs was demonstrated when antagonists able to block all mGluRs were applied [13]. The present study extended these previous findings by revealing that the endogenous activity was group specific in that group II antagonist LY341495 but not group

III antagonist CPPG produced significant increases in IPSCs in the presence of glutamate uptake blockers (Fig. 4). Different signaling pathways involved in these two groups of mGluRs in modulating neurotransmission may account partly for this observation. Both group II and III mGluRs can regulate transmitter release via affecting presynaptic voltage-gated calcium channels [3,4,5]. However, group III mGluRs may cause presynaptic modulation of GABA release evoked only by neuronal activity, while additional mechanisms for the modulation mediated by group II mGluRs could exist [13], increasing the chance of detecting endogenous activity of group II mGluRs. Both groups of receptors have high affinity for glutamate, with group II receptors being more sensitive than group III receptors [3,56]. We speculate that under in vivo conditions, if activation of both groups is possible, group II mGluRs may be activated under low-frequency activity, exerting a tonic modulation of GABA release and the activation of group III receptors may require more intense activity of glutamate synapses. Once being activated, these mGluRs work in synergy to prevent saturation of heteroreceptor-mediated regulation of GABA release in NL, ensuring proper synaptic strength of the GABAergic input and its modulatory function on ITD coding.

## Acknowledgments

We thank Lie-Cheng Wang for participating in part of the experiments, and William Hamlet for critical reading of the manuscript.

## Author Contributions

Conceived and designed the experiments: ZT YL. Performed the experiments: ZT. Analyzed the data: ZT. Wrote the paper: YL.

## References

- de Jong AP, Verhage M (2009) Presynaptic signal transduction pathways that modulate synaptic transmission. *Curr Opin Neurobiol* 19: 245–253.
- Stephens GJ (2009) G-protein-coupled-receptor-mediated presynaptic inhibition in the cerebellum. *Trends Pharmacol Sci* 30: 421–430.
- Cartmell J, Schoepp DD (2000) Regulation of neurotransmitter release by metabotropic glutamate receptors. *J Neurochem* 75: 889–907.
- Nicoletti F, Bockaert J, Collingridge GL, Conn PJ, Ferraguti F, et al. (2011) Metabotropic glutamate receptors: from the workbench to bedside. *Neuropharmacology* 60: 1017–1041.
- Niswender CM, Conn PJ (2010) Metabotropic glutamate receptors: physiology, pharmacology, and disease. *Annu Rev Pharmacol Toxicol* 50: 295–322.
- Chalifoux JR, Carter AG (2011) GABA<sub>B</sub> receptor modulation of synaptic function. *Curr Opin Neurobiol* 21: 339–344.
- Ulrich D, Bettler B (2007) GABA<sub>B</sub> receptors: synaptic functions and mechanisms of diversity. *Curr Opin Neurobiol* 17: 298–303.
- Fujino K, Oertel D (2003) Bidirectional synaptic plasticity in the cerebellum-like mammalian dorsal cochlear nucleus. *Proc Natl Acad Sci* 100: 265–270.
- Luo B, Wang HT, Su YY, Wu SH, Chen L (2011) Activation of presynaptic GABA<sub>B</sub> receptors modulates GABAergic and glutamatergic inputs to the medial geniculate body. *Hear Res* 280: 157–165.
- Sanes DH, McGee J, Walsh EJ (1998) Metabotropic glutamate receptor activation modulates sound level processing in the cochlear nucleus. *J Neurophysiol* 80: 209–217.
- Lu Y, Burger RM, Rubel EW (2005) GABA<sub>B</sub> receptor activation modulates GABA<sub>A</sub> receptor-mediated inhibition in chicken nucleus magnocellularis neurons. *J Neurophysiol* 93: 1429–1438.
- Lu Y (2007) Endogenous mGluR activity suppresses GABAergic transmission in avian cochlear nucleus magnocellularis neurons. *J Neurophysiol* 97: 1018–1029.
- Tang ZQ, Gao H, Lu Y (2009) Control of a depolarizing GABAergic input in an auditory coincidence detection circuit. *J Neurophysiol* 102: 1672–1683.
- Hyson RL (2005) The analysis of interaural time differences in the chick brain stem. *Physiol Behav* 86: 297–305.
- Rubel EW, Fritsch B (2002) Auditory system development: primary auditory neurons and their targets. *Annu Rev Neurosci* 25: 51–101.
- Hendricks SJ, Rubel EW, Nishi R (2006) Formation of the avian nucleus magnocellularis from the auditory anlage. *J Comp Neurol* 498(4): 433–442.
- Young SR, Rubel EW (1983) Frequency-specific projections of individual neurons in chick brainstem auditory nuclei. *J Neurosci* 3(7): 1373–1378.
- Gao H, Lu Y (2008) Early development of intrinsic and synaptic properties of chicken nucleus laminaris neurons. *Neuroscience* 153: 131–143.
- Sanchez JT, Wang Y, Rubel EW, Barria A (2010) Development of glutamatergic synaptic transmission in binaural auditory neurons. *J Neurophysiol* 104: 1774–1789.
- Code RA, Burd GD, Rubel EW (1989) Development of GABA immunoreactivity in brainstem auditory nuclei of the chick: ontogeny of gradients in terminal staining. *J Comp Neurol* 284: 504–518.
- Ben-Ari Y, Gaiarsa JL, Tyzio R, Khazipov R (2007) GABA: a pioneer transmitter that excites immature neurons and generates primitive oscillations. *Physiol Rev* 87: 1215–1284.
- Barbour B, Häusser M (1997) Intersynaptic diffusion of neurotransmitter. *Trends Neurosci* 20: 377–384.
- Galvan A, Kuwajima M, Smith Y (2006) Glutamate and GABA receptors and transporters in the basal ganglia: what does their subsynaptic localization reveal about their function? *Neuroscience* 143: 351–375.
- Tang ZQ, Dinh EH, Shi W, Lu Y (2011) Ambient GABA-activated tonic inhibition sharpens auditory coincidence detection via a depolarizing shunting mechanism. *J Neurosci* 31: 6121–6131.
- Ye JH, Zhang J, Xiao C, Kong JQ (2006) Patch-clamp studies in the CNS illustrate a simple new method for obtaining viable neurons in rat brain slices: glycerol replacement of NaCl protects CNS neurons. *J Neurosci Methods* 158: 251–259.
- Barry PH (1994) JPCalc, a software package for calculating liquid junction potential corrections in patch-clamp, intracellular, epithelial and bilayer measurements and for correcting junction potential measurements. *J Neurosci Methods* 51: 107–116.
- Burger RM, Cramer KS, Pfeiffer JD, Rubel EW (2005) Avian superior olivary nucleus provides divergent inhibitory input to parallel auditory pathways. *J Comp Neurol* 481: 6–18.
- Lachica EA, Rübsamen R, Rubel EW (1994) GABAergic terminals in nucleus magnocellularis and laminaris originate from the superior olivary nucleus. *J Comp Neurol* 348: 403–418.
- Yang L, Monsivais P, Rubel EW (1999) The superior olivary nucleus and its influence on nucleus laminaris: a source of inhibitory feedback for coincidence detection in the avian auditory brainstem. *J Neurosci* 19: 2313–2325.
- Lanza M, Fassio A, Gemignani A, Bonanno G, Raiteri M (1993) CGP 52432: a novel potent and selective GABA<sub>B</sub> autoreceptor antagonist in rat cerebral cortex. *Eur J Pharmacol* 237: 191–195.

31. Drew GM, Mitchell VA, Vaughan CW (2008) Glutamate spillover modulates GABAergic synaptic transmission in the rat midbrain periaqueductal grey via metabotropic glutamate receptors and endocannabinoid signaling. *J Neurosci* 28: 808–815.
32. Nishino E, Yamada R, Kuba H, Hioki H, Furuta T, et al. (2008) Sound-intensity-dependent compensation for the small interaural time difference cue for sound source localization. *J Neurosci* 28: 7153–7164.
33. Pinheiro PS, Mulle C (2008) Presynaptic glutamate receptors: physiological functions and mechanisms of action. *Nat Rev Neurosci* 9: 423–436.
34. Fukui I, Sato T, Ohmori H (2006) Improvement of phase information at low sound frequency in nucleus magnocellularis of the chicken. *J Neurophysiol* 96: 633–641.
35. Warchol ME, Dallos P (1990) Neural coding in the chick cochlear nucleus. *J Comp Physiol [A]* 166: 721–734.
36. Scanziani M, Salin PA, Vogt KE, Malenka RC, Nicoll RA (1997) Use-dependent increases in glutamate concentration activate presynaptic metabotropic glutamate receptors. *Nature* 385: 630–634.
37. Shimamoto K, Lebrun B, Yasuda-Kamatani Y, Sakaitani M, Shigeri Y, et al. (1998) DL-threo-beta-benzoyloxyaspartate, a potent blocker of excitatory amino acid transporters. *Mol Pharmacol* 53: 195–201.
38. Tsukada S, Iino M, Takayasu Y, Shimamoto K, Ozawa S (2005) Effects of a novel glutamate transporter blocker, (2S, 3S)-3-[3-[4-(trifluoromethyl) benzoylamino] benzyloxy] aspartate (TFB-TBOA), on activities of hippocampal neurons. *Neuropharmacology* 48: 479–491.
39. Toms NJ, Jane DE, Kemp MC, Bedingfield JS, Roberts PJ (1996) The effects of (RS)-alpha-cyclopropyl-4-phosphonophenylglycine ((RS)-CPPG), a potent and selective metabotropic glutamate receptor antagonist. *Br J Pharmacol* 119: 851–854.
40. Saunders JC, Coles RB, Gates GR (1973) The development of auditory evoked responses in the cochlea and cochlear nuclei of the chick. *Brain Res* 63: 59–74.
41. Lippe WR (1994) Rhythmic spontaneous activity in the developing avian auditory system. *J Neurosci* 14: 1486–1495.
42. Bellone C, Lüscher C, Mameli M (2008) Mechanisms of synaptic depression triggered by metabotropic glutamate receptors. *Cell Mol Life Sci* 65: 2913–2923.
43. Gladding CM, Fitzjohn SM, Molnár E (2009) Metabotropic glutamate receptor-mediated long-term depression: molecular mechanisms. *Pharmacol Rev* 61: 395–412.
44. Asztely F, Erdemli G, Kullmann DM (1997) Extrasynaptic glutamate spillover in the hippocampus: dependence on temperature and the role of active glutamate uptake. *Neuron* 18: 281–293.
45. Kullmann DM (2000) Spillover and synaptic cross talk mediated by glutamate and GABA in the mammalian brain. *Prog Brain Res* 125: 339–351.
46. Mitchell SJ, Silver RA (2000) Glutamate spillover suppresses inhibition by activating presynaptic mGluRs. *Nature* 404: 498–502.
47. Okubo Y, Iino M (2011) Visualization of glutamate as a volume transmitter. *J Physiol* 589: 481–488.
48. Smith ZD (1981) Organization and development of brain stem auditory nuclei of the chicken: dendritic development in N. Laminaris. *J Comp Neurol* 203: 309–333.
49. Smith DJ, Rubel EW (1979) Organization and development of brain stem auditory nuclei of the chicken: dendritic gradients in nucleus laminaris. *J Comp Neurol* 186: 213–239.
50. Korn MJ, Koppel SJ, Cramer KS (2011) Astrocyte-secreted factors modulate a gradient of primary dendritic arbors in nucleus laminaris of the avian auditory brainstem. *PLoS One* 6(11): e27383.
51. Parks TN, Collins P, Conlee JW (1983) Morphology and origin of axonal endings in nucleus laminaris of the chicken. *J Comp Neurol* 214: 32–42.
52. Tabor KM, Wong RO, Rubel EW (2011) Topography and morphology of the inhibitory projection from superior olivary nucleus to nucleus laminaris in chickens (*Gallus gallus*). *J Comp Neurol* 519: 358–375.
53. Parks TN (1981) Morphology of axosomatic endings in an avian cochlear nucleus: nucleus magnocellularis of the chicken. *J Comp Neurol* 203: 425–440.
54. Zhang S, Trussell LO (1994) A characterization of excitatory postsynaptic potentials in the avian nucleus magnocellularis. *J Neurophysiol* 72(2): 705–718.
55. Ryugo DK, Parks TN (2003) Primary innervation of the avian and mammalian cochlear nucleus. *Brain Res Bull* 60: 435–456.
56. Panatier A, Poulain DA, Oliet SH (2004) Regulation of transmitter release by high-affinity group III mGluRs in the supraoptic nucleus of the rat hypothalamus. *Neuropharmacology* 47: 333–341.
